# Supplementary material
Source: publisher figshare collection journal article supplement (https://wiley.figshare.com/ndownloader/files/33662195)
Supplement: Supplementary file 1 [file 33662195]

## Sheet: Sheet1
film.no	replicate.no	species	treatment	concentration	time	film.gel.ID	bottle no	cohort	sex	survival	counts	median.pct.tail	stdv	scoring ID
2	1	Acartia tonsa	baseline	0	0	207	7	1	F	1	35	43.321	25.6132	BK
2	1	Acartia tonsa	baseline	0	0	207	7	1	F	1	44	54.6684	18.8609	AS
2	2	Acartia tonsa	baseline	0	0	208	8	1	F	1	16	28.8969	26.8671	BK
2	3	Acartia tonsa	baseline	0	0	211	9	1	F	1	42	18.0904	17.1257	AS
2	3	Acartia tonsa	baseline	0	0	211	9	1	F	1	34	23.1461	19.2742	BK
2	4	Acartia tonsa	baseline	0	0	216	16	1	F	1	24	36.9036	23.2594	BK
2	5	Acartia tonsa	baseline	0	0	217	17	1	F	1	50	50.8501	25.3008	AS
2	5	Acartia tonsa	baseline	0	0	217	17	1	F	1	15	54.2388	20.7731	BK
2	6	Acartia tonsa	baseline	0	0	218	18	1	F	1	50	28.5758	21.8587	BK
4	7	Acartia tonsa	baseline	0	0	407	25	2	F	1	50	18.0282	25.7206	AS
4	7	Acartia tonsa	baseline	0	0	407	25	2	F	1	50	26.6518	21.4198	BK
4	8	Acartia tonsa	baseline	0	0	408	26	2	F	1	50	44.1136	29.6161	BK
4	9	Acartia tonsa	baseline	0	0	409	27	2	F	1	50	33.4596	28.5417	BK
4	10	Acartia tonsa	baseline	0	0	416	34	2	F	1	50	31.1969	22.0167	BK
4	10	Acartia tonsa	baseline	0	0	416	34	2	F	1	50	36.6263	26.8257	AS
4	11	Acartia tonsa	baseline	0	0	417	35	2	M	1	50	19.8655	23.8577	BK
4	12	Acartia tonsa	baseline	0	0	418	36	2	F	1	50	10.7774	18.3219	AS
4	12	Acartia tonsa	baseline	0	0	418	36	2	F	1	28	33.4336	27.3937	BK
6	13	Acartia tonsa	baseline	0	0	606	43	3	F	1	31	32.5801	18.6074	BK
6	14	Acartia tonsa	baseline	0	0	607	44	3	F	1	50	46.8347	22.9768	BK
6	15	Acartia tonsa	baseline	0	0	608	45	3	F	1	31	32.5801	18.6074	BK
6	16	Acartia tonsa	baseline	0	0	616	52	3	F	1	NA	NA	NA	NA
6	17	Acartia tonsa	baseline	0	0	617	53	3	F	1	50	32.0661	17.225	BK
6	18	Acartia tonsa	baseline	0	0	618	54	3	F	1	50	46.7646	28.0401	BK
8	19	Acartia tonsa	baseline	0	0	807	61	4	F	1	50	24.9623	22.2097	AS
8	20	Acartia tonsa	baseline	0	0	808	62	4	F	1	38	14.1686	25.1486	AS
8	21	Acartia tonsa	baseline	0	0	809	63	4	M	1	50	32.1615	19.9103	AS
8	22	Acartia tonsa	baseline	0	0	816	70	4	NA	1	50	7.41975	25.6497	AS
8	23	Acartia tonsa	baseline	0	0	817	71	4	NA	1	50	17.893	22.9465	AS
8	24	Acartia tonsa	baseline	0	0	818	72	4	NA	1	50	23.1324	24.2515	AS
3	1	Acartia tonsa	H2O2	0	0	307	7	1	F	1	50	47.3067	26.7513	AS
3	2	Acartia tonsa	H2O2	0	0	308	8	1	F	1	9	37.725	32.323	BK
3	3	Acartia tonsa	H2O2	0	0	309	9	1	F	1	30	17.4291	23.5532	BK
3	4	Acartia tonsa	H2O2	0	0	316	16	1	F	1	32	43.0672	26.2878	BK
3	5	Acartia tonsa	H2O2	0	0	317	17	1	F	1	42	35.6579	27.1784	BK
3	6	Acartia tonsa	H2O2	0	0	318	18	1	F	1	50	29.3411	25.0345	BK
5	7	Acartia tonsa	H2O2	0	0	507	25	2	F	1	50	51.6766	30.5107	BK
5	8	Acartia tonsa	H2O2	0	0	508	26	2	F	1	50	69.9492	27.2635	BK
5	9	Acartia tonsa	H2O2	0	0	509	27	2	F	1	50	61.5451	23.5381	BK
5	10	Acartia tonsa	H2O2	0	0	516	34	2	F	1	50	52.9138	24.8505	BK
5	11	Acartia tonsa	H2O2	0	0	517	35	2	M	1	50	76.2158	23.9101	BK
5	12	Acartia tonsa	H2O2	0	0	518	36	2	F	1	50	13.3843	20.8495	BK
7	13	Acartia tonsa	H2O2	0	0	707	43	3	F	1	50	56.1303	29.9682	BK
7	14	Acartia tonsa	H2O2	0	0	708	44	3	F	1	50	68.503	26.5616	BK
7	15	Acartia tonsa	H2O2	0	0	709	45	3	F	1	50	58.1205	22.7453	BK
7	16	Acartia tonsa	H2O2	0	0	716	52	3	F	1	50	60.9715	22.2121	BK
7	17	Acartia tonsa	H2O2	0	0	717	53	3	F	1	50	58.2005	27.6937	BK
7	18	Acartia tonsa	H2O2	0	0	718	54	3	F	1	50	48.5137	26.8073	BK
9	19	Acartia tonsa	H2O2	0	0	910	61	4	F	1	50	51.8622	25.4799	BK
9	20	Acartia tonsa	H2O2	0	0	911	62	4	F	1	50	30.7364	26.9233	BK
9	21	Acartia tonsa	H2O2	0	0	912	63	4	M	1	50	35.4533	26.9648	BK
9	22	Acartia tonsa	H2O2	0	0	916	70	4	NA	1	50	37.4485	26.7239	BK
9	23	Acartia tonsa	H2O2	0	0	917	71	4	NA	1	50	27.3818	25.158	BK
9	24	Acartia tonsa	H2O2	0	0	918	72	4	NA	1	50	38.0776	26.3557	BK
10	1	Acartia tonsa	copper	0	6	1007	79	5	F	1	50	34.9881	27.4336	AS
10	2	Acartia tonsa	copper	0	6	1016	88	5	F	1	50	4.42998	27.8324	AS
11	3	Acartia tonsa	copper	0	6	1107	97	8	F	1	50	48.2548	25.0108	BK
11	4	Acartia tonsa	copper	0	6	1116	106	8	M	1	50	50.4468	28.8903	BK
12	5	Acartia tonsa	copper	0	6	1207	115	11	F	1	23	15.3012	22.5877	AS
12	6	Acartia tonsa	copper	0	6	1216	124	11	F	1	40	22.9542	20.1789	AS
13	7	Acartia tonsa	copper	0	6	1307	133	14	F	1	31	19.8704	25.1972	BK
13	8	Acartia tonsa	copper	0	6	1316	142	14	F	1	20	16.4298	24.5978	BK
13	8	Acartia tonsa	copper	0	6	1316	142	14	F	1	21	22.6804	26.6428	AS
10	1	Acartia tonsa	copper	6	6	1008	80	5	M	1	50	43.8321	18.4623	AS
10	2	Acartia tonsa	copper	6	6	1017	89	5	F	1	50	29.0871	27.763	AS
11	3	Acartia tonsa	copper	6	6	1108	98	8	F	1	50	51.9017	21.3915	BK
11	4	Acartia tonsa	copper	6	6	1117	107	8	F	1	33	13.8755	17.0103	AS
12	5	Acartia tonsa	copper	6	6	1208	116	11	F	1	34	24.7589	25.7696	AS
12	6	Acartia tonsa	copper	6	6	1217	125	11	F	1	26	3.58341	21.6452	AS
13	7	Acartia tonsa	copper	6	6	1308	134	14	F	1	29	37.847	30.732	BK
13	8	Acartia tonsa	copper	6	6	1317	143	14	F	1	33	41.0536	23.2378	BK
13	8	Acartia tonsa	copper	6	6	1317	143	14	F	1	50	44.4228	25.0105	AS
10	1	Acartia tonsa	copper	60	6	1009	81	5	F	1	50	45.1652	32.2334	AS
10	2	Acartia tonsa	copper	60	6	1018	90	5	F	1	50	20.0575	27.1556	AS
11	3	Acartia tonsa	copper	60	6	1109	99	8	F	1	36	54.1897	22.6589	BK
11	3	Acartia tonsa	copper	60	6	1109	99	8	F	1	50	48.1426	27.4254	AS
11	4	Acartia tonsa	copper	60	6	1118	108	8	F	1	31	26.2016	15.1413	AS
12	5	Acartia tonsa	copper	60	6	1209	117	11	F	1	30	32.2571	22.804	AS
12	6	Acartia tonsa	copper	60	6	1218	126	11	F	1	50	1.27116	8.91616	AS
13	7	Acartia tonsa	copper	60	6	1309	135	14	F	1	50	20.5984	20.3461	BK
13	8	Acartia tonsa	copper	60	6	1318	144	14	F	1	14	15.1332	30.1079	BK
13	8	Acartia tonsa	copper	60	6	1318	144	14	F	1	21	31.7	22.8202	AS
14	1	Acartia tonsa	copper	0	72	1407	151	6	F	1	4	2.89007	3.4748	AS
14	2	Acartia tonsa	copper	0	72	1416	160	6	NA	1	NA	NA	NA	NA
15	3	Acartia tonsa	copper	0	72	1505	169	9	F	1	50	46.9824	25.022	BK
15	4	Acartia tonsa	copper	0	72	1516	178	9	F	1	50	51.5585	26.7581	BK
16	5	Acartia tonsa	copper	0	72	1607	187	12	F	1	50	21.6574	30.5277	BK
16	6	Acartia tonsa	copper	0	72	1616	196	12	F	1	13	24.1226	21.3896	BK
17	7	Acartia tonsa	copper	0	72	1707	205	15	F	1	NA	NA	NA	NA
17	8	Acartia tonsa	copper	0	72	1716	214	15	F	1	NA	NA	NA	NA
14	1	Acartia tonsa	copper	6	72	1408	152	6	F	1	25	0.833652	15.8251	AS
14	2	Acartia tonsa	copper	6	72	1417	161	6	F	1	NA	NA	NA	NA
15	3	Acartia tonsa	copper	6	72	1508	170	9	F	1	NA	NA	NA	NA
15	4	Acartia tonsa	copper	6	72	1517	179	9	F	1	50	7.28915	25.0705	AS
16	5	Acartia tonsa	copper	6	72	1608	188	12	NA	1	50	21.0563	26.0227	BK
16	6	Acartia tonsa	copper	6	72	1617	197	12	F	1	50	35.097	30.7809	BK
17	7	Acartia tonsa	copper	6	72	1708	206	15	F	1	NA	NA	NA	NA
17	8	Acartia tonsa	copper	6	72	1717	215	15	F	1	27	34.5958	26.1742	BK
17	8	Acartia tonsa	copper	6	72	1717	215	15	F	1	40	39.0977	26.9054	AS
14	1	Acartia tonsa	copper	60	72	1409	153	6	F	1	24	67.385	13.1304	AS
14	2	Acartia tonsa	copper	60	72	1418	162	6	F	1	NA	NA	NA	NA
15	3	Acartia tonsa	copper	60	72	1509	171	9	F	1	50	34.7751	27.7384	BK
15	4	Acartia tonsa	copper	60	72	1518	180	9	F	1	50	0.517364	11.3339	AS
16	5	Acartia tonsa	copper	60	72	1609	189	12	F	1	30	21.0836	21.0038	BK
16	5	Acartia tonsa	copper	60	72	1609	189	12	F	1	40	41.5018	17.8657	AS
16	6	Acartia tonsa	copper	60	72	1618	198	12	F	1	17	9.19461	9.68564	BK
17	7	Acartia tonsa	copper	60	72	1709	207	15	F	1	NA	NA	NA	NA
17	8	Acartia tonsa	copper	60	72	1718	216	15	F	1	33	17.2077	31.211	AS
17	8	Acartia tonsa	copper	60	72	1718	216	15	F	1	17	43.6307	22.362	BK
18	1	Acartia tonsa	copper	0	96	1807	223	7	F	1	50	77.3465	29.9221	AS
18	1	Acartia tonsa	copper	0	96	1807	223	7	F	1	30	84.2268	26.7033	BK
18	2	Acartia tonsa	copper	0	96	1816	232	7	F	1	26	71.0083	35.462	BK
18	2	Acartia tonsa	copper	0	96	1816	232	7	F	1	35	72.7926	33.8303	AS
19	3	Acartia tonsa	copper	0	96	1907	241	10	NA	1	50	1.38291	22.4321	AS
19	4	Acartia tonsa	copper	0	96	1916	250	10	NA	1	50	0.10069	24.6323	AS
20	5	Acartia tonsa	copper	0	96	2007	259	13	F	1	16	46.8857	26.7776	BK
20	5	Acartia tonsa	copper	0	96	2007	259	13	F	1	12	49.7933	16.0657	AS
20	6	Acartia tonsa	copper	0	96	2016	268	13	F	1	25	60.1472	32.7172	BK
21	7	Acartia tonsa	copper	0	96	2107	277	16	F	1	50	80.1358	29.2366	BK
21	8	Acartia tonsa	copper	0	96	2116	286	16	F	1	50	73.8846	33.5622	BK
18	1	Acartia tonsa	copper	6	96	1808	224	7	F	1	50	75.4066	26.9527	AS
18	1	Acartia tonsa	copper	6	96	1808	224	7	F	1	50	76.6185	24.4882	BK
18	2	Acartia tonsa	copper	6	96	1817	233	7	F	1	50	52.1214	28.1845	BK
19	3	Acartia tonsa	copper	6	96	1908	242	10	NA	1	50	48.4679	31.0575	AS
19	4	Acartia tonsa	copper	6	96	1917	251	10	F	0	50	66.1145	31.7856	AS
20	5	Acartia tonsa	copper	6	96	2008	260	13	F	0	50	6.54939	17.7045	AS
20	5	Acartia tonsa	copper	6	96	2008	260	13	F	0	19	13.9866	33.005	BK
20	6	Acartia tonsa	copper	6	96	2017	269	13	F	1	NA	NA	NA	NA
21	7	Acartia tonsa	copper	6	96	2108	278	16	F	0	20	81.7975	28.7753	BK
21	8	Acartia tonsa	copper	6	96	2117	287	16	F	0	NA	NA	NA	NA
18	1	Acartia tonsa	copper	60	96	1809	225	7	F	0	17	37.2334	36.9338	BK
18	1	Acartia tonsa	copper	60	96	1809	225	7	F	0	20	73.0948	39.7535	BK
18	2	Acartia tonsa	copper	60	96	1818	234	7	F	0	NA	NA	NA	NA
19	3	Acartia tonsa	copper	60	96	1909	243	10	F	0	NA	NA	NA	NA
19	4	Acartia tonsa	copper	60	96	1918	252	10	F	0	50	0.187288	8.74529	AS
20	5	Acartia tonsa	copper	60	96	2009	261	13	F	0	19	13.9866	33.005	BK
20	6	Acartia tonsa	copper	60	96	2018	270	13	F	0	NA	NA	NA	NA
21	7	Acartia tonsa	copper	60	96	2109	279	16	F	0	40	20.2675	21.9647	AS
21	7	Acartia tonsa	copper	60	96	2109	279	16	F	0	36	29.0164	28.4347	BK
21	8	Acartia tonsa	copper	60	96	2118	288	16	F	0	50	10.0928	28.3536	BK
2	1	Temora longicornis	baseline	0	0	204	4	1	F	1	23	55.1688	23.9071	BK
2	1	Temora longicornis	baseline	0	0	204	4	1	F	1	50	61.9326	25.5609	AS
2	2	Temora longicornis	baseline	0	0	205	5	1	F	1	50	58.6903	30.6237	BK
2	3	Temora longicornis	baseline	0	0	206	6	1	F	1	42	43.6477	33.2714	BK
2	4	Temora longicornis	baseline	0	0	213	13	1	M	1	50	60.0516	29.5199	BK
2	5	Temora longicornis	baseline	0	0	214	14	1	F	1	50	77.1413	37.178	BK
2	6	Temora longicornis	baseline	0	0	215	15	1	M	1	50	59.9208	30.6104	BK
4	7	Temora longicornis	baseline	0	0	404	22	2	M	1	50	28.9139	17.132	AS
4	7	Temora longicornis	baseline	0	0	404	22	2	M	1	33	48.9733	26.5617	BK
4	8	Temora longicornis	baseline	0	0	405	23	2	F	1	42	27.2473	29.133	BK
4	8	Temora longicornis	baseline	0	0	405	23	2	F	1	50	29.887	22.3949	AS
4	9	Temora longicornis	baseline	0	0	406	24	2	M	1	50	37.2411	21.7862	BK
4	10	Temora longicornis	baseline	0	0	413	31	2	F	1	NA	NA	NA	NA
4	11	Temora longicornis	baseline	0	0	414	32	2	F	1	NA	NA	NA	NA
4	12	Temora longicornis	baseline	0	0	415	33	2	F	1	50	15.6283	21.1476	AS
6	14	Temora longicornis	baseline	0	0	604	41	3	F	1	50	36.613	22.5838	BK
6	15	Temora longicornis	baseline	0	0	605	42	3	F	1	19	32.5325	20.5272	BK
6	16	Temora longicornis	baseline	0	0	613	49	3	M	1	NA	NA	NA	NA
6	17	Temora longicornis	baseline	0	0	614	50	3	F	1	NA	NA	NA	NA
6	18	Temora longicornis	baseline	0	0	615	51	3	F	1	NA	NA	NA	NA
8	19	Temora longicornis	baseline	0	0	804	58	4	F	1	50	66.6744	30.123	AS
8	20	Temora longicornis	baseline	0	0	805	59	4	M	1	50	64.0906	22.3343	AS
8	21	Temora longicornis	baseline	0	0	806	60	4	F	1	50	48.4581	21.7704	AS
8	22	Temora longicornis	baseline	0	0	813	67	4	F	1	50	53.8049	25.8353	AS
8	23	Temora longicornis	baseline	0	0	814	68	4	NA	1	50	24.0682	25.6365	AS
8	24	Temora longicornis	baseline	0	0	815	69	4	NA	1	50	6.31598	21.3144	AS
3	1	Temora longicornis	H2O2	0	0	304	4	1	F	1	50	54.9794	28.3154	AS
3	1	Temora longicornis	H2O2	0	0	304	4	1	F	1	50	57.6748	25.4176	BK
3	2	Temora longicornis	H2O2	0	0	305	5	1	F	1	40	26.1239	30.0107	AS
3	2	Temora longicornis	H2O2	0	0	305	5	1	F	1	50	41.7366	29.0903	BK
3	3	Temora longicornis	H2O2	0	0	306	6	1	F	1	31	41.4456	27.889	AS
3	4	Temora longicornis	H2O2	0	0	313	13	1	M	1	50	38.0906	26.1629	BK
3	5	Temora longicornis	H2O2	0	0	314	14	1	F	1	50	53.5758	25.7803	BK
3	6	Temora longicornis	H2O2	0	0	315	15	1	M	1	50	38.5831	27.247	BK
5	7	Temora longicornis	H2O2	0	0	504	22	2	M	1	50	21.5888	26.5998	BK
5	8	Temora longicornis	H2O2	0	0	505	23	2	F	1	50	33.006	23.9605	BK
5	9	Temora longicornis	H2O2	0	0	506	24	2	M	1	50	23.4015	18.078	BK
5	10	Temora longicornis	H2O2	0	0	513	31	2	F	1	50	21.7574	22.3954	BK
5	11	Temora longicornis	H2O2	0	0	514	32	2	F	1	45	23.1848	17.1656	AS
5	11	Temora longicornis	H2O2	0	0	514	32	2	F	1	24	40.8686	20.4811	BK
5	12	Temora longicornis	H2O2	0	0	515	33	2	F	1	50	50.1277	23.0085	AS
5	12	Temora longicornis	H2O2	0	0	515	33	2	F	1	50	56.1529	24.3765	BK
7	13	Temora longicornis	H2O2	0	0	704	40	3	M	1	50	28.8964	24.5648	BK
7	14	Temora longicornis	H2O2	0	0	705	41	3	F	1	50	21.3877	19.6955	BK
7	15	Temora longicornis	H2O2	0	0	706	42	3	F	1	30	30.5573	20.4855	BK
7	16	Temora longicornis	H2O2	0	0	713	49	3	M	1	50	37.1814	27.3576	BK
7	17	Temora longicornis	H2O2	0	0	714	50	3	F	1	50	24.1965	19.6534	BK
7	18	Temora longicornis	H2O2	0	0	715	51	3	F	1	50	24.1372	16.7939	BK
9	19	Temora longicornis	H2O2	0	0	904	58	4	F	1	50	86.8123	36.3446	BK
9	20	Temora longicornis	H2O2	0	0	905	59	4	M	1	50	67.7359	26.655	BK
9	21	Temora longicornis	H2O2	0	0	906	60	4	F	1	50	54.8777	27.7802	BK
9	22	Temora longicornis	H2O2	0	0	913	67	4	F	1	50	58.3805	28.0522	BK
9	23	Temora longicornis	H2O2	0	0	914	68	4	NA	1	50	54.0702	24.1839	BK
9	24	Temora longicornis	H2O2	0	0	915	69	4	NA	1	50	25.8028	25.6221	BK
10	1	Temora longicornis	copper	0	6	1004	76	5	M	1	50	53.8182	23.2103	AS
10	2	Temora longicornis	copper	0	6	1013	85	5	M	1	50	73.1028	21.1171	AS
11	3	Temora longicornis	copper	0	6	1104	94	8	F	1	40	39.5741	23.8838	BK
11	4	Temora longicornis	copper	0	6	1113	103	8	NA	1	24	27.3427	25.7798	BK
11	4	Temora longicornis	copper	0	6	1113	103	8	NA	1	50	31.5354	27.9344	AS
12	5	Temora longicornis	copper	0	6	1204	112	11	F	1	50	28.1577	24.7264	AS
12	6	Temora longicornis	copper	0	6	1213	121	11	M	1	50	32.1901	21.3403	AS
13	7	Temora longicornis	copper	0	6	1304	130	14	F	1	50	34.0101	28.952	BK
13	8	Temora longicornis	copper	0	6	1313	139	14	M	1	50	12.4968	15.5164	AS
13	8	Temora longicornis	copper	0	6	1313	139	14	M	1	50	26.8515	27.016	BK
10	1	Temora longicornis	copper	6	6	1005	77	5	NA	1	50	58.6057	24.2846	AS
10	2	Temora longicornis	copper	6	6	1014	86	5	NA	1	50	21.9792	22.0872	AS
11	3	Temora longicornis	copper	6	6	1105	95	8	F	1	NA	NA	NA	NA
11	4	Temora longicornis	copper	6	6	1114	104	8	NA	1	50	24.5452	25.1224	AS
11	4	Temora longicornis	copper	6	6	1114	104	8	NA	1	11	41.4945	18.577	BK
12	5	Temora longicornis	copper	6	6	1205	113	11	F	1	29	47.6494	14.3989	AS
12	6	Temora longicornis	copper	6	6	1214	122	11	M	1	50	32.2923	24.231	AS
13	7	Temora longicornis	copper	6	6	1305	131	14	M	1	50	24.6595	24.3123	BK
13	8	Temora longicornis	copper	6	6	1314	140	14	F	1	50	20.2702	27.8734	BK
10	1	Temora longicornis	copper	60	6	1006	78	5	F	1	50	39.0558	20.045	AS
10	2	Temora longicornis	copper	60	6	1015	87	5	NA	1	50	45.366	20.1972	AS
11	3	Temora longicornis	copper	60	6	1106	96	8	F	1	31	36.0575	24.8769	BK
11	3	Temora longicornis	copper	60	6	1106	96	8	F	1	50	39.3218	25.2311	AS
11	4	Temora longicornis	copper	60	6	1115	105	8	NA	1	50	24.679	16.759	AS
11	4	Temora longicornis	copper	60	6	1115	105	8	NA	1	26	42.4006	22.7054	BK
12	5	Temora longicornis	copper	60	6	1206	114	11	M	1	50	8.61944	22.6734	AS
12	6	Temora longicornis	copper	60	6	1215	123	11	F	1	NA	NA	NA	NA
13	7	Temora longicornis	copper	60	6	1306	132	14	F	1	50	32.5229	31.336	BK
13	8	Temora longicornis	copper	60	6	1315	141	14	M	1	50	9.13448	18.1314	BK
14	1	Temora longicornis	copper	0	72	1404	148	6	F	1	22	47.176	26.5443	AS
14	2	Temora longicornis	copper	0	72	1413	157	6	M	1	NA	NA	NA	NA
15	3	Temora longicornis	copper	0	72	1504	166	9	F	1	36	39.2877	25.6699	BK
15	3	Temora longicornis	copper	0	72	1504	166	9	F	1	50	22.6549	33.9724	AS
15	4	Temora longicornis	copper	0	72	1513	175	9	F	1	50	47.3106	25.6025	BK
16	5	Temora longicornis	copper	0	72	1604	184	12	F	1	50	52.0097	24.921	BK
16	6	Temora longicornis	copper	0	72	1613	193	12	M	1	50	58.8186	27.7567	BK
17	7	Temora longicornis	copper	0	72	1704	202	15	M	1	50	58.7566	21.2547	BK
17	8	Temora longicornis	copper	0	72	1713	211	15	M	1	50	22.5243	25.0729	BK
14	1	Temora longicornis	copper	6	72	1405	149	6	F	1	NA	NA	NA	NA
14	2	Temora longicornis	copper	6	72	1414	158	6	M	1	NA	NA	NA	NA
15	3	Temora longicornis	copper	6	72	1506	167	9	F	1	9	42.1275	32.4715	BK
15	4	Temora longicornis	copper	6	72	1514	176	9	F	1	50	49.7667	30.3683	BK
16	5	Temora longicornis	copper	6	72	1605	185	12	NA	1	NA	NA	NA	NA
16	6	Temora longicornis	copper	6	72	1614	194	12	F	1	41	21.4866	32.0668	AS
16	6	Temora longicornis	copper	6	72	1614	194	12	F	1	33	36.9639	28.5731	BK
17	7	Temora longicornis	copper	6	72	1705	203	15	M	1	50	47.9153	23.4655	BK
17	8	Temora longicornis	copper	6	72	1714	212	15	F	1	50	48.4929	27.9315	BK
14	1	Temora longicornis	copper	60	72	1406	150	6	F	1	6	27.4092	29.4937	AS
14	2	Temora longicornis	copper	60	72	1415	159	6	M	1	NA	NA	NA	NA
15	3	Temora longicornis	copper	60	72	1507	168	9	M	1	50	45.0147	30.1009	BK
15	4	Temora longicornis	copper	60	72	1515	177	9	F	1	50	33.4354	27.4102	BK
16	5	Temora longicornis	copper	60	72	1606	186	12	M	1	50	20.7141	22.2677	BK
16	6	Temora longicornis	copper	60	72	1615	195	12	M	1	50	4.62715	19.7301	AS
16	6	Temora longicornis	copper	60	72	1615	195	12	M	1	51	11.4138	23.2482	BK
17	7	Temora longicornis	copper	60	72	1706	204	15	M	1	50	32.3306	25.0285	BK
17	8	Temora longicornis	copper	60	72	1715	213	15	F	1	41	41.013	31.9943	BK
18	1	Temora longicornis	copper	0	96	1804	220	7	F	0	38	68.4474	27.814	BK
18	2	Temora longicornis	copper	0	96	1813	229	7	NA	1	50	19.6727	29.0717	BK
19	3	Temora longicornis	copper	0	96	1904	238	10	M	1	50	41.7495	26.4593	AS
19	4	Temora longicornis	copper	0	96	1913	247	10	F	1	50	86.2369	27.7901	AS
20	5	Temora longicornis	copper	0	96	2004	256	13	F	1	NA	NA	NA	NA
20	6	Temora longicornis	copper	0	96	2013	265	13	M	0	NA	NA	NA	NA
21	7	Temora longicornis	copper	0	96	2104	274	16	M	1	50	83.4498	24.3168	BK
21	8	Temora longicornis	copper	0	96	2113	283	16	F	1	36	83.5729	27.8162	BK
18	1	Temora longicornis	copper	6	96	1805	221	7	M	1	50	53.6911	28.3844	AS
18	1	Temora longicornis	copper	6	96	1805	221	7	M	1	34	61.2416	24.3223	BK
18	2	Temora longicornis	copper	6	96	1814	230	7	NA	1	50	77.7738	31.2677	BK
19	3	Temora longicornis	copper	6	96	1905	239	10	F	1	50	44.7741	33.1498	AS
19	4	Temora longicornis	copper	6	96	1914	248	10	M	1	50	33.2505	26.2307	AS
20	5	Temora longicornis	copper	6	96	2005	257	13	M	1	50	38.7824	27.4397	BK
20	6	Temora longicornis	copper	6	96	2014	266	13	M	1	50	15.1203	18.4256	BK
21	7	Temora longicornis	copper	6	96	2105	275	16	M	1	50	81.7306	27.6334	BK
21	8	Temora longicornis	copper	6	96	2114	284	16	F	1	50	74.7635	34.5174	BK
18	1	Temora longicornis	copper	60	96	1806	222	7	F	1	50	89.7322	23.6496	BK
18	1	Temora longicornis	copper	60	96	1806	222	7	F	1	50	90.5148	24.1772	AS
18	2	Temora longicornis	copper	60	96	1815	231	7	F	1	50	82.1038	27.4261	BK
19	3	Temora longicornis	copper	60	96	1906	240	10	M	1	50	24.9004	33.1692	AS
19	4	Temora longicornis	copper	60	96	1915	249	10	M	1	50	64.9263	32.8659	AS
20	5	Temora longicornis	copper	60	96	2006	258	13	M	1	50	68.7533	24.0423	BK
20	6	Temora longicornis	copper	60	96	2015	267	13	M	1	50	35.0279	29.9955	BK
21	7	Temora longicornis	copper	60	96	2106	276	16	M	1	50	63.5569	31.2601	BK
21	8	Temora longicornis	copper	60	96	2115	285	16	M	0	50	62.2971	28.9082	BK
2	1	Tigriopus brevicornis	baseline	0	0	201	1	1	M	1	NA	NA	NA	NA
2	2	Tigriopus brevicornis	baseline	0	0	202	2	1	M	1	50	20.1437	15.8383	AS
2	2	Tigriopus brevicornis	baseline	0	0	202	2	1	M	1	30	26.5995	33.4544	BK
2	3	Tigriopus brevicornis	baseline	0	0	203	3	1	M	1	27	57.267	35.9905	BK
2	3	Tigriopus brevicornis	baseline	0	0	203	3	1	M	1	50	85.1832	22.3932	AS
2	5	Tigriopus brevicornis	baseline	0	0	209	11	1	F	1	50	42.5865	26.2389	BK
2	6	Tigriopus brevicornis	baseline	0	0	210	12	1	F	1	37	29.4797	25.5967	BK
2	4	Tigriopus brevicornis	baseline	0	0	212	10	1	M	1	50	23.8687	26.0796	BK
4	7	Tigriopus brevicornis	baseline	0	0	401	19	2	M	1	50	54.4892	35.5306	AS
4	8	Tigriopus brevicornis	baseline	0	0	402	20	2	F	1	18	32.8523	27.346	BK
4	8	Tigriopus brevicornis	baseline	0	0	402	20	2	F	1	50	67.3241	15.838	AS
4	8	Tigriopus brevicornis	baseline	0	0	403	20	2	F	1	33	51.6836	29.3104	BK
4	8	Tigriopus brevicornis	baseline	0	0	403	20	2	F	1	50	57.0766	26.7641	AS
4	10	Tigriopus brevicornis	baseline	0	0	410	28	2	F	1	22	30.4278	24.6909	BK
4	11	Tigriopus brevicornis	baseline	0	0	411	29	2	F	1	50	16.5988	22.2644	AS
4	12	Tigriopus brevicornis	baseline	0	0	412	30	2	F	1	38	33.4494	27.6754	BK
6	13	Tigriopus brevicornis	baseline	0	0	601	37	3	F	1	50	57.0022	33.4867	BK
6	14	Tigriopus brevicornis	baseline	0	0	602	38	3	M	1	51	62.3124	26.7877	BK
6	15	Tigriopus brevicornis	baseline	0	0	603	39	3	M	1	50	62.9475	27.3727	BK
6	16	Tigriopus brevicornis	baseline	0	0	609	46	3	F	1	50	60.4088	32.8435	BK
6	17	Tigriopus brevicornis	baseline	0	0	610	47	3	M	1	8	52.5561	28.7469	BK
6	17	Tigriopus brevicornis	baseline	0	0	611	47	3	M	1	50	41.248	26.0158	BK
6	18	Tigriopus brevicornis	baseline	0	0	612	48	3	M	1	22	41.4184	19.7601	BK
8	19	Tigriopus brevicornis	baseline	0	0	801	55	4	M	1	50	24.993	21.0947	AS
8	20	Tigriopus brevicornis	baseline	0	0	802	56	4	M	1	50	16.5581	18.395	AS
8	21	Tigriopus brevicornis	baseline	0	0	803	57	4	F	1	50	30.9286	20.4249	AS
8	22	Tigriopus brevicornis	baseline	0	0	810	64	4	F	1	50	22.1114	28.175	AS
8	23	Tigriopus brevicornis	baseline	0	0	811	65	4	M	1	50	26.1434	21.8959	AS
8	24	Tigriopus brevicornis	baseline	0	0	812	66	4	M	1	50	0.629977	29.7152	AS
3	1	Tigriopus brevicornis	H2O2	0	0	301	1	1	M	1	32	25.8112	13.8689	BK
3	1	Tigriopus brevicornis	H2O2	0	0	301	1	1	M	1	50	31.547	13.7833	AS
3	2	Tigriopus brevicornis	H2O2	0	0	302	2	1	M	1	50	17.7084	13.0756	AS
3	2	Tigriopus brevicornis	H2O2	0	0	302	2	1	M	1	50	18.0764	19.1231	BK
3	3	Tigriopus brevicornis	H2O2	0	0	303	3	1	M	1	50	52.298	30.2147	BK
3	3	Tigriopus brevicornis	H2O2	0	0	303	3	1	M	1	50	75.0463	29.9273	AS
3	5	Tigriopus brevicornis	H2O2	0	0	311	11	1	F	1	50	52.6833	28.339	BK
3	6	Tigriopus brevicornis	H2O2	0	0	312	12	1	F	1	23	23.3331	32.1799	BK
5	7	Tigriopus brevicornis	H2O2	0	0	501	19	2	M	1	50	47.076	26.6167	BK
5	8	Tigriopus brevicornis	H2O2	0	0	502	20	2	F	1	50	43.325	28.3611	BK
5	9	Tigriopus brevicornis	H2O2	0	0	503	21	2	F	1	50	54.0727	25.3526	BK
5	10	Tigriopus brevicornis	H2O2	0	0	510	28	2	F	1	50	43.047	19.4281	BK
5	11	Tigriopus brevicornis	H2O2	0	0	511	29	2	F	1	50	52.1584	25.3062	BK
5	12	Tigriopus brevicornis	H2O2	0	0	512	30	2	F	1	50	51.6735	27.2758	BK
7	13	Tigriopus brevicornis	H2O2	0	0	701	37	3	F	1	50	61.2228	30.6993	BK
7	14	Tigriopus brevicornis	H2O2	0	0	702	38	3	M	1	50	57.0564	29.0291	BK
7	15	Tigriopus brevicornis	H2O2	0	0	703	39	3	M	1	50	68.7237	25.0857	BK
7	16	Tigriopus brevicornis	H2O2	0	0	710	46	3	F	1	19	43.4514	25.8501	BK
7	17	Tigriopus brevicornis	H2O2	0	0	711	47	3	M	1	50	53.204	23.8025	BK
7	18	Tigriopus brevicornis	H2O2	0	0	712	48	3	M	1	50	48.6749	21.3317	BK
9	19	Tigriopus brevicornis	H2O2	0	0	901	55	4	M	1	50	33.1081	24.2699	BK
9	20	Tigriopus brevicornis	H2O2	0	0	902	56	4	M	1	50	17.6962	19.683	BK
9	21	Tigriopus brevicornis	H2O2	0	0	903	57	4	F	1	50	30.9442	24.1548	BK
9	19	Tigriopus brevicornis	H2O2	0	0	907	61	4	F	1	50	27.8486	25.9456	BK
9	20	Tigriopus brevicornis	H2O2	0	0	908	62	4	F	1	50	16.8435	19.4227	BK
9	21	Tigriopus brevicornis	H2O2	0	0	909	63	4	M	1	50	46.6497	30.5677	BK
3	4	Tigriopus brevicornis	H2O2	0	0	3010	10	1	M	1	31	20.749	25.1815	BK
10	1	Tigriopus brevicornis	copper	0	6	1001	73	5	F	1	50	22.8435	16.2719	AS
10	2	Tigriopus brevicornis	copper	0	6	1010	82	5	F	1	50	12.8218	17.7247	AS
11	4	Tigriopus brevicornis	copper	0	6	1110	100	8	M	1	NA	NA	NA	NA
12	5	Tigriopus brevicornis	copper	0	6	1201	109	11	F	1	40	1.54393	4.01572	AS
12	6	Tigriopus brevicornis	copper	0	6	1210	118	11	M	1	50	4.77744	6.98725	AS
13	7	Tigriopus brevicornis	copper	0	6	1301	127	14	M	1	23	11.5244	16.419	AS
13	8	Tigriopus brevicornis	copper	0	6	1310	136	14	M	1	50	12.12	22.667	AS
10	1	Tigriopus brevicornis	copper	6	6	1002	74	5	F	1	50	25.0133	20.1732	AS
10	2	Tigriopus brevicornis	copper	6	6	1011	83	5	M	1	50	22.89	19.5928	AS
11	3	Tigriopus brevicornis	copper	6	6	1102	92	8	M	1	50	59.4448	25.4071	BK
11	4	Tigriopus brevicornis	copper	6	6	1111	101	8	F	1	50	60.7142	28.373	BK
12	5	Tigriopus brevicornis	copper	6	6	1202	110	11	M	1	22	2.93186	4.15327	AS
12	6	Tigriopus brevicornis	copper	6	6	1211	119	11	M	1	50	6.29339	16.0446	AS
13	7	Tigriopus brevicornis	copper	6	6	1302	128	14	M	1	41	4.21417	17.7069	AS
13	7	Tigriopus brevicornis	copper	6	6	1302	128	14	M	1	29	4.49726	20.3491	BK
13	8	Tigriopus brevicornis	copper	6	6	1311	137	14	M	1	29	5.92926	14.362	BK
10	1	Tigriopus brevicornis	copper	60	6	1003	75	5	F	1	50	14.4844	15.4245	AS
10	2	Tigriopus brevicornis	copper	60	6	1012	84	5	M	1	50	17.5531	15.7925	AS
11	3	Tigriopus brevicornis	copper	60	6	1103	93	8	F	1	50	56.4745	31.3488	BK
11	4	Tigriopus brevicornis	copper	60	6	1112	102	8	F	1	48	5.37847	12.4773	AS
11	4	Tigriopus brevicornis	copper	60	6	1112	102	8	F	1	19	33.1436	21.0643	BK
12	5	Tigriopus brevicornis	copper	60	6	1203	111	11	M	1	25	14.2926	19.8037	AS
12	6	Tigriopus brevicornis	copper	60	6	1212	120	11	F	1	NA	NA	NA	NA
13	7	Tigriopus brevicornis	copper	60	6	1303	129	14	F	1	27	7.18363	8.70826	BK
13	7	Tigriopus brevicornis	copper	60	6	1303	129	14	F	1	50	7.99279	9.56806	AS
13	8	Tigriopus brevicornis	copper	60	6	1312	138	14	M	1	44	4.09767	17.0588	AS
13	8	Tigriopus brevicornis	copper	60	6	1312	138	14	M	1	18	32.7149	31.8631	BK
14	1	Tigriopus brevicornis	copper	0	72	1401	145	6	F	1	20	8.71013	10.8402	AS
14	2	Tigriopus brevicornis	copper	0	72	1410	154	6	M	1	21	9.35585	17.5713	AS
15	3	Tigriopus brevicornis	copper	0	72	1501	163	9	M	1	40	12.2104	20.8264	AS
15	4	Tigriopus brevicornis	copper	0	72	1510	172	9	F	1	50	41.8422	26.7628	BK
16	5	Tigriopus brevicornis	copper	0	72	1601	181	12	M	1	50	9.00446	16.89	BK
16	6	Tigriopus brevicornis	copper	0	72	1610	190	12	M	1	51	23.3531	29.5157	BK
17	7	Tigriopus brevicornis	copper	0	72	1701	199	15	M	1	32	16.154	14.4036	AS
17	7	Tigriopus brevicornis	copper	0	72	1701	199	15	M	1	15	26.3134	10.8307	BK
17	8	Tigriopus brevicornis	copper	0	72	1710	208	15	M	1	50	20.912	26.0216	AS
17	8	Tigriopus brevicornis	copper	0	72	1710	208	15	M	1	33	32.6803	19.4042	BK
14	1	Tigriopus brevicornis	copper	6	72	1402	146	6	M	1	NA	NA	NA	NA
14	2	Tigriopus brevicornis	copper	6	72	1411	155	6	M	1	29	15.6695	22.2223	AS
15	3	Tigriopus brevicornis	copper	6	72	1502	164	9	M	1	16	29.246	32.7879	BK
15	4	Tigriopus brevicornis	copper	6	72	1511	173	9	M	1	50	41.8422	26.7628	BK
16	5	Tigriopus brevicornis	copper	6	72	1602	182	12	F	1	50	18.9898	17.0081	BK
16	6	Tigriopus brevicornis	copper	6	72	1611	191	12	M	1	50	22.1055	22.4461	BK
17	7	Tigriopus brevicornis	copper	6	72	1702	200	15	F	1	50	16.8312	20.7074	AS
17	7	Tigriopus brevicornis	copper	6	72	1702	200	15	F	1	20	27.6421	26.5591	BK
17	8	Tigriopus brevicornis	copper	6	72	1711	209	15	M	1	50	6.67536	14.6486	AS
17	8	Tigriopus brevicornis	copper	6	72	1711	209	15	M	1	24	23.1203	21.1461	BK
14	1	Tigriopus brevicornis	copper	60	72	1403	147	6	M	1	NA	NA	NA	NA
14	2	Tigriopus brevicornis	copper	60	72	1412	156	6	M	1	NA	NA	NA	NA
15	3	Tigriopus brevicornis	copper	60	72	1503	165	9	M	1	50	21.0888	21.6678	BK
15	4	Tigriopus brevicornis	copper	60	72	1512	174	9	M	1	41	19.9089	20.9594	AS
15	4	Tigriopus brevicornis	copper	60	72	1512	174	9	M	1	15	30.021	24.9688	BK
16	5	Tigriopus brevicornis	copper	60	72	1603	183	12	M	1	48	13.4881	14.7715	AS
16	5	Tigriopus brevicornis	copper	60	72	1603	183	12	M	1	34	13.8766	16.6589	BK
16	6	Tigriopus brevicornis	copper	60	72	1612	192	12	M	1	50	21.6062	28.3963	BK
17	7	Tigriopus brevicornis	copper	60	72	1703	201	15	M	1	41	16.8564	23.1694	BK
17	8	Tigriopus brevicornis	copper	60	72	1712	210	15	M	1	49	8.134	17.8811	AS
17	8	Tigriopus brevicornis	copper	60	72	1712	210	15	M	1	22	20.0483	26.5356	BK
18	1	Tigriopus brevicornis	copper	0	96	1801	217	7	F	1	50	35.7654	20.8764	AS
18	1	Tigriopus brevicornis	copper	0	96	1801	217	7	F	1	50	29.2954	24.7213	BK
18	2	Tigriopus brevicornis	copper	0	96	1810	226	7	M	1	50	6.94317	20.3875	BK
19	3	Tigriopus brevicornis	copper	0	96	1901	235	10	M	1	39	11.8154	20.8477	AS
19	4	Tigriopus brevicornis	copper	0	96	1910	244	10	F	1	50	5.20015	19.0968	AS
20	5	Tigriopus brevicornis	copper	0	96	2001	253	13	M	1	25	12.227	16.7046	AS
20	6	Tigriopus brevicornis	copper	0	96	2010	262	13	M	1	27	33.9139	27.3354	BK
21	7	Tigriopus brevicornis	copper	0	96	2101	271	16	M	1	50	21.6528	18.9178	BK
21	8	Tigriopus brevicornis	copper	0	96	2110	280	16	F	1	50	12.6946	28.0989	BK
18	1	Tigriopus brevicornis	copper	6	96	1802	218	7	M	1	50	12.9512	19.7925	AS
18	1	Tigriopus brevicornis	copper	6	96	1802	218	7	M	1	50	28.6322	34.867	BK
18	2	Tigriopus brevicornis	copper	6	96	1811	227	7	F	1	50	15.4572	23.8206	BK
19	3	Tigriopus brevicornis	copper	6	96	1902	236	10	M	1	50	8.02966	21.7982	AS
19	4	Tigriopus brevicornis	copper	6	96	1911	245	10	M	1	50	5.28307	16.282	AS
20	5	Tigriopus brevicornis	copper	6	96	2002	254	13	F	1	18	13.7304	14.0587	AS
20	6	Tigriopus brevicornis	copper	6	96	2011	263	13	M	1	40	15.2975	28.1543	AS
20	6	Tigriopus brevicornis	copper	6	96	2011	263	13	M	1	16	40.9375	23.4672	BK
21	7	Tigriopus brevicornis	copper	6	96	2102	272	16	M	1	50	21.7274	24.9803	BK
21	8	Tigriopus brevicornis	copper	6	96	2111	281	16	M	1	30	10.3658	11.9095	AS
21	8	Tigriopus brevicornis	copper	6	96	2111	281	16	M	1	31	10.7518	15.6508	BK
18	1	Tigriopus brevicornis	copper	60	96	1803	219	7	M	1	50	16.9376	21.9206	AS
18	1	Tigriopus brevicornis	copper	60	96	1803	219	7	M	1	50	17.5572	16.8813	BK
18	2	Tigriopus brevicornis	copper	60	96	1812	228	7	M	1	50	10.3977	22.5624	BK
19	3	Tigriopus brevicornis	copper	60	96	1903	237	10	M	1	50	9.2066	21.4779	AS
19	4	Tigriopus brevicornis	copper	60	96	1912	246	10	M	1	50	6.91441	24.0898	AS
20	5	Tigriopus brevicornis	copper	60	96	2003	255	13	M	1	NA	NA	NA	NA
20	6	Tigriopus brevicornis	copper	60	96	2012	264	13	M	1	38	12.4556	26.5491	AS
20	6	Tigriopus brevicornis	copper	60	96	2012	264	13	M	1	18	37.9919	27.4025	BK
21	7	Tigriopus brevicornis	copper	60	96	2103	273	16	M	1	50	25.7713	22.6955	BK
21	8	Tigriopus brevicornis	copper	60	96	2112	282	16	M	0	NA	NA	NA	NA
